# Supplementary material for: Rapid design of a core–shell-like metal hydroxide/oxide composite and activated carbon from biomass for high-performance supercapattery applications
Source: Royal Society of Chemistry journal article supplement (doi:10.1039/c9qi00308h), 2019-01-01
Supplement: c9qi00308h1.pdf [file c9qi00308h1.pdf]

## Electronic Supplementary Information

### **Rapid design of core-shell-like metal hydroxide/oxide composite and activated carbon from biomass for high-performance hybrid supercapattery application**

*S. Chandra Sekhar,<sup>a</sup> Goli Nagaraju,<sup>a,b</sup> Bhimanaboina Ramulu,<sup>a</sup> and Jae Su Yu<sup>a\*</sup>*

<sup>a</sup>Department of Electronic Engineering, Institute for Wearable Convergence Electronics, Kyung Hee University, 1732 Deogyong-daero, Gihung-gu, Yongin-si, Gyeonggi-do 17104, Republic of Korea

<sup>b</sup>Department of Chemical Engineering, College of Engineering, Kyung Hee University, 1732 Deogyong-daero, Gihung-gu, Yongin-si, Gyeonggi-do 17104, Republic of Korea.

\*Address correspondence to [jsyu@khu.ac.kr](mailto:jsyu@khu.ac.kr)

Tel: +82-31-201-3820; Fax: +82-31-204-8115

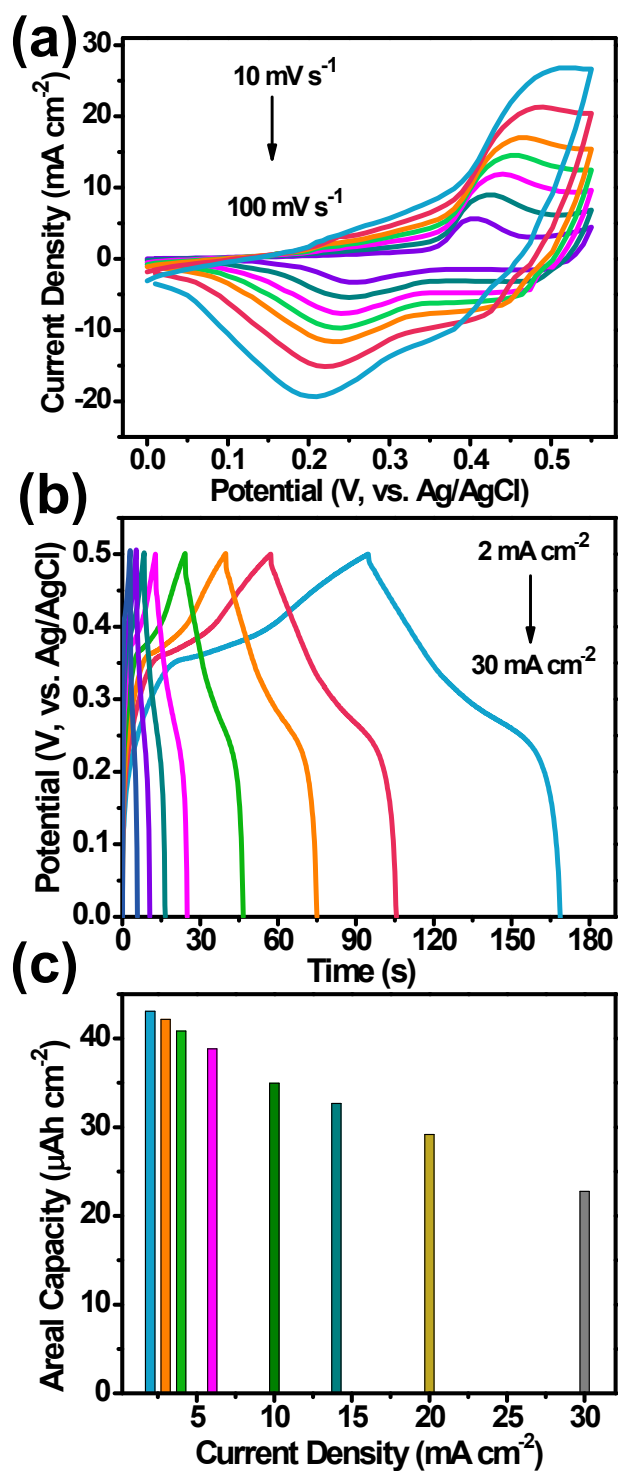

**Fig. S1.** (a-b) CV and GCD curves of the bare Cu<sub>2</sub>O CAS electrode investigated at different scan rates and current densities, respectively. (c) Estimated areal capacity values of the bare Cu<sub>2</sub>O CAS electrode.

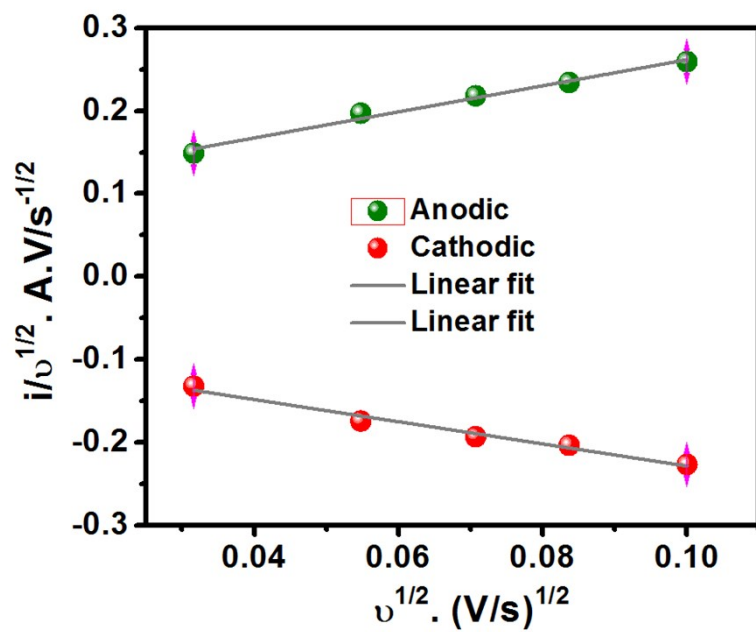

Fig. S2. Relationship between applied scan rates and peak currents.

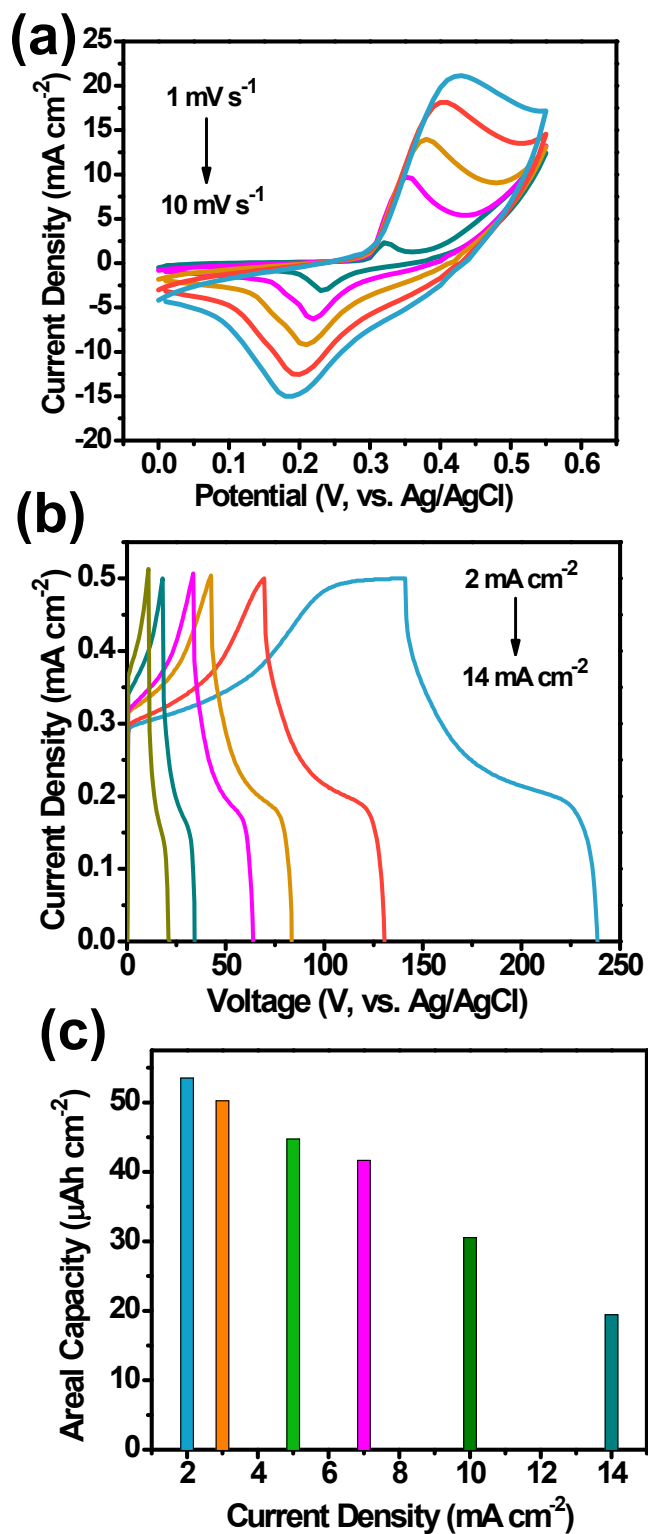

**Fig. S3.** Electrochemical performance of bare Ni(OH)<sub>2</sub> electrode. (a) CV curves and (b) GCD curves and (c) areal capacity values vs. current densities.

Fig. S3(a) shows the cyclic voltammetry (CV) curves measured at different scan rates from 1 to 10 mV s<sup>-1</sup> in the potential range of 0-0.55 V. All the CV curves demonstrated two prominent redox peaks, indicating that the charge storage process in Ni(OH)<sub>2</sub> material mainly governs the Faradaic redox reactions. Even at high scan rate of 10 mV s<sup>-1</sup>, the CV curve retained its shape without distortion and the redox peaks still can be observed, indicating the good reversibility of material. The galvanic charge-discharge (GCD) tests were also investigated in the fixed potential window of 0-0.55 V at different current densities (2-14 mA cm<sup>-2</sup>) and plotted in Fig. S3(b). In well-agreement with the CV results, the obtained GCD plateaus with non-linear curves further confirmed the Faradaic charge storage mechanism. Based on the discharge time, the areal capacities of Ni(OH)<sub>2</sub> material were calculated using Eq. (1). The obtained areal capacity values were 53.5, 50.2, 44.7, 41.6, 30.5 and 19.4 μAh cm<sup>-2</sup> at the current densities of 2, 3, 4, 6, 10 and 14 mA cm<sup>-2</sup>, respectively and the obtained values were plotted against current densities in Fig. S3(c).

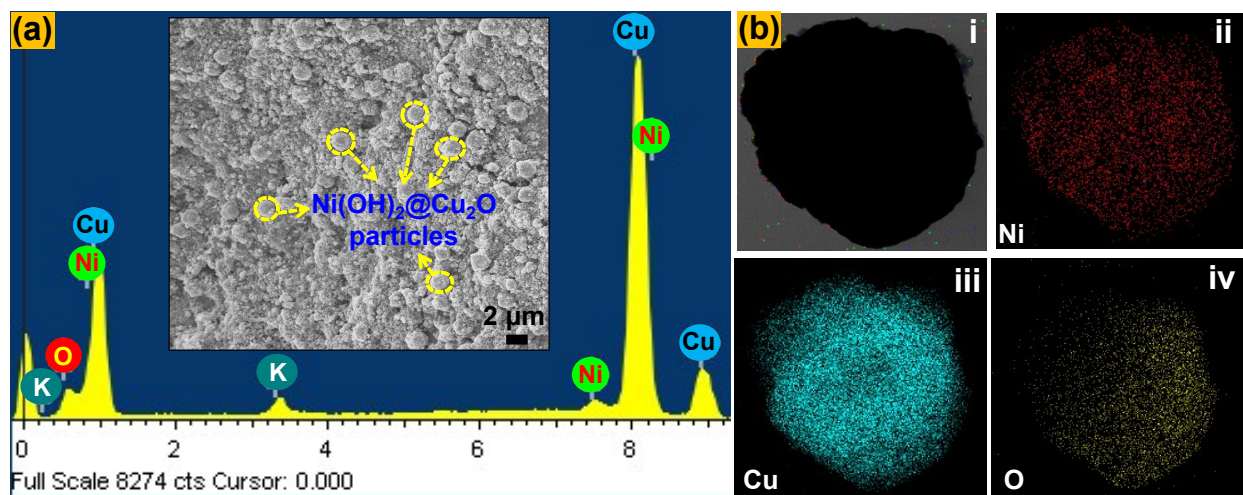

**Fig. S4.** (a) EDX spectrum and (b) elemental mapping images of Ni(OH)<sub>2</sub>@Cu<sub>2</sub>O particles recorded after long-term stability test. Inset in (a) shows the FE-SEM image of Ni(OH)<sub>2</sub>@Cu<sub>2</sub>O particles.
